# Supplementary material for: Isotopic measurements in water vapor, precipitation, and seawater during EUREC 4 A
Source: Copernicus journal article supplement (doi:10.5194/essd-2022-3), 2022-01-31
Supplement: Supplementary file 4 [file BCO_Cals.xlsx]

## Sheet: L1115_Calibrations
startdate	enddate	H2Om	H2Os	d18Oraw_m	d18Oraw_s	d18Ocal_m	d18Ocal_s	d18Otarget	d18Ocal_err	d2Hraw_m	d2Hraw_s	d2Hcal_m	d2Hcal_s	d2Htarget	d2Hcal_err	standarad	sample_id
20200113_2058	20200113_2120	18469	139	-22.33	0.17	-11.21	0.19	-11.21	0	-77.66	0.63	-79.72	0.62	-79.69	0.03	MPI	BCOS1
20200115_1358	20200115_1515	17772	241	-8.46	0.18	4.53	0.2	4.52	0	22.22	0.77	17.69	0.75	17.7	0	PEE	BCOS3
20200116_0113	20200116_0200	15922	490	-22.13	0.18	-11.13	0.21	-11.11	0.02	-75.64	0.65	-80.81	0.67	-80.83	-0.02	MPI	BCOS4
20200119_1428	20200119_1452	17729	377	-22.36	0.17	-11.75	0.20	-11.15	0.6	-77.29	0.63	-83.17	0.64	-80.87	2.3	MPI	BCOS8
20200119_1453	20200119_1539	31298	130	-21.15	0.21	-10.31	0.25	-11.15	-0.84	-74.37	0.58	-80.17	0.59	-80.87	-0.7	MPI	BCOS8
20200121_1244	20200121_1318	29938	329	-21.37	0.23	-11.21	0.28	-11.22	-0.01	-73.92	0.71	-80.96	0.74	-80.94	0.02	MPI	BCOS9
20200122_0226	20200122_0307	29024	27	-21.46	0.20	-11.22	0.24	-11.23	-0.01	-75.48	0.54	-80.86	0.54	-80.86	0	MPI	BCOS10
20200122_1142	20200122_1224	30317	271	-21.29	0.23	-11.2	0.29	-11.22	-0.02	-73.28	0.72	-80.93	0.75	-80.82	0.11	MPI	BCOS11
20200122_2150	20200122_2237	28043	416	-21.20	0.21	-11.14	0.26	-11.16	-0.02	-74.98	0.56	-80.53	0.57	-80.55	-0.02	MPI	BCOS12
20200124_0011	20200124_0114	30572	74	-20.87	0.28	-9.95	0.33	-11.1	-1.15	-72.91	0.56	-76.74	0.56	-79.93	-3.19	MPI	BCOS13
20200125_1255	20200125_1336	32046	64	-21.05	0.25	-10.44	0.30	-11.13	-0.69	-72.44	0.54	-76.89	0.54	-80.16	-3.27	MPI	BCOS14
20200126_1104	20200126_1153	31802	31	-21.43	0.21	-11.08	0.26	-11.14	-0.06	-74.14	0.53	-78.99	0.53	-80.3	-1.31	MPI	BCOS15
20200127_1255	20200127_1400	30529	202	-21.20	0.25	-11.02	0.31	-11.15	-0.13	-74.09	1.06	-79.39	1.06	-80.46	-1.07	MPI	BCOS16
20200127_1443	20200127_1544	19453	61	-30.58	0.18	-22.51	0.22	-20.9638	1.5462	-168.7	0.88	-174.88	0.89	-171.014	3.86568	PCD	BCOS17
20200128_0128	20200128_0226	16892	349	-8.78	0.18	4.5	0.23	4.47	-0.03	20.10	0.81	17.23	0.83	17.36	0.13	PEE	BCOS18
20200128_0322	20200128_0408	18484	56	-22.03	0.16	-11.08	0.19	-11.09	-0.01	-76.32	0.73	-79.68	0.73	-79.76	-0.08	MPI	BCOS19
20200129_1941	20200129_2011	18580	69	-21.95	0.17	-11.15	0.20	-11.14	0.01	-75.26	0.62	-80.23	0.63	-80.3	-0.07	MPI	BCOS20
20200131_0014	20200131_0040	16283	191	-22.14	0.14	-11.38	0.16	-11.14	0.24	-77.52	0.64	-82.57	0.66	-80.3	2.27	MPI	BCOS21
20200131_1404	20200131_1520	18898	210	-22.11	0.17	-11.18	0.19	-11.17	0.01	-76.14	0.70	-80.39	0.71	-80.42	-0.03	MPI	BCOS22
	MAE								0.28401						0.97293
Calibrations used in postprocessing in bold
Dew point experiment from March 2020
f = s*x+c
s	c	r-squared
0.804116	-1032.54	0.99

## Sheet: LGR Calibrations
LGR - Stds Used
startdate	enddate	H2Om	H2Os	d18Om	d18Os	d18Ocal	d18Oref	d18Oref-d18Ocal	d2Hm	d2Hs	d2Hcal	d2Href	d2Href-d2Hcal	standard_name	sample_id
20200118_1607	20200118_1617	24835	445.88	-13.295	0.1161	-11.4318	-11.1888	0.243006	-81.877	0.2817	-80.7532	-80.8131	-0.0598741	MPI	BCOS7
20200119_1412	20200119_1422	25450	216.28	-13.417	0.1151	-11.5488	-11.2251	0.323678	-82.673	1.814	-81.5469	-80.8258	0.721115	MPI	BCOS8
20200121_1332	20200121_1342	24971.5	549.13	-13.12	0.1243	-11.2639	-11.22	0.0439186	-82.366	1.078	-81.2408	-80.9363	0.304508	MPI	BCOS9
20200122_0320	20200122_0330	25240.7	388.74	-13.402	0.1086	-11.5344	-11.2302	0.304235	-83.151	0.3306	-82.0235	-80.8617	1.16185	MPI	BCOS10
20200122_1230	20200122_1240	24688.6	439.04	-13.239	0.0974	-11.3781	-11.221	0.157059	-82.794	0.6425	-81.6676	-80.8226	0.844939	MPI	BCOS11
20200122_2241	20200122_2251	21881.9	618.34	-13.481	0.1368	-11.6102	-11.1628	0.447321	-83.553	0.2969	-82.4244	-80.5489	1.87544	MPI	BCOS12
20200124_0120	20200124_0130	24870.4	387.82	-13.385	0.1229	-11.5181	-11.2169	0.301203	-82.915	0.9065	-81.7882	-80.8182	0.970034	MPI	BCOS13
20200125_1247	20200125_1254	15961.6	811.43	-13.065	0.2394	-11.2112	-11.2052	0.0059695	-81.918	0.3586	-80.7941	-80.6169	0.177236	MPI	BCOS14
20200127_1420	20200127_1430	27138.5	30.07	-13.342	0.0975	-11.4768	-11.2159	0.260907	-82.778	0.2828	-81.6516	-80.7163	0.935356	MPI	BCOS16
20200127_1616	20200127_1626	8843.4	823.81	2.358	0.285	3.58171	4.47096	0.889252	13.703	0.957	14.5494	17.359	2.80961	PEE	Unknown
20200128_0244	20200128_0254	23824.5	167.98	2.457	0.112	3.67667	4.47096	0.794296	14.385	0.261	15.2295	17.359	2.12959	PEE	BCOS18
20200128_0313	20200128_0319	24554.4	125.97	-13.028	0.0919	-11.1757	-11.0851	0.0905715	-82.354	0.2561	-81.2288	-79.7586	1.47023	MPI	BCOS19
20200129_2056	20200129_2102	15030.7	242.03	-13.057	0.1709	-11.2035	-11.1382	0.0652941	-81.937	0.353	-80.8131	-80.3013	0.511798	MPI	BCOS20
20200131_1356	20200131_1402	24859	360.5	-14.079	0.0918	-12.1837	-11.166	1.01773	-83.929	0.2376	-82.7993	-80.4213	2.37799	MPI	BCOS22
20200202_0201	20200202_0211	17455	672.95	-13.096	0.1462	-11.2409	-11.1374	0.103491	-82.568	0.3663	-81.4422	-80.4214	1.02078	MPI	BCOS23
20200203_2106	20200203_2111	18529.5	766.69	-13.47	0.0978	-11.5996	-11.2076	0.392053	-83.101	0.3268	-81.9737	-80.7205	1.25313	MPI	BCOS24
20200204_2321	20200204_2331	13298.2	655.64	-14.01	0.2522	-12.1176	-11.1692	0.948388	-82.066	0.5327	-80.9417	-80.601	0.340682	MPI	BCOS25
								0.375787					1.1085
VSMOW Fit Model	a	b
d18O	0.959144	1.32005
dD	0.997098	0.886192

## Sheet: H2O_correction
Dew point experiment from March 2020
f = s*x+c
s	c	r-squared
0.804116	-1032.54	0.99

## Sheet: Comparison
Picarro
startdate	enddate	H2Om	H2Os	d18Om	d18Os	d18Ocal	d2Hm	d2Hs	d2Hcal	standard_name	sample_id		H20_Diff	d18O_Diff	dD_Diff
20200121_1244	20200121_1318	29866	479	-21.38	0.29	-11.2223	-73.9	0.79	-80.9363	MPI	BCOS9		4894.48	0.0416569	0.304508
20200122_0226	20200122_0307	29032	29	-21.47	0.24	-11.2302	-75.48	0.64	-80.8617	MPI	BCOS10		3791.35	0.304235	1.16185
20200122_1142	20200122_1224	30357	213	-21.3	0.27	-11.221	-73.17	0.78	-80.8226	MPI	BCOS11		5668.39	0.157059	0.844939
20200122_2150	20200122_2237	28005	387	-21.22	0.23	-11.1628	-75	0.65	-80.5489	MPI	BCOS12		6123.07	0.447321	1.87544
20200128_0128	20200128_0226	16997	228	-8.8	0.2	4.47096	20.22	0.87	17.359	PEE	BCOS18		-6827.47	0.794296	2.12959
20200128_0322	20200128_0408	18482	57	-22.03	0.21	-11.0851	-76.4	0.83	-79.7586	MPI	BCOS19		-6072.43	0.0905715	1.47023
LGR
20200121_1332	20200121_1342	24971.5	549.13	-13.12	0.1243	-11.2639	-82.366	1.078	-81.2408	MPI	BCOS9
20200122_0320	20200122_0330	25240.7	388.74	-13.402	0.1086	-11.5344	-83.151	0.3306	-82.0235	MPI	BCOS10
20200122_1230	20200122_1240	24688.6	439.04	-13.239	0.0974	-11.3781	-82.794	0.6425	-81.6676	MPI	BCOS11
20200122_2241	20200122_2251	21881.9	618.34	-13.481	0.1368	-11.6102	-83.553	0.2969	-82.4244	MPI	BCOS12
20200128_0244	20200128_0254	23824.5	167.98	2.457	0.112	3.67667	14.385	0.261	15.2295	PEE	BCOS18
20200128_0313	20200128_0319	24554.4	125.97	-13.028	0.0919	-11.1757	-82.354	0.2561	-81.2288	MPI	BCOS19
